# Supplementary material for: Mid-infrared spectroscopy beyond the diffraction limit via direct measurement of the photothermal effect
Source: Royal Society of Chemistry journal article supplement (doi:10.1039/c5nr04854k), 2015-01-01
Supplement: c5nr04854k1.pdf [file c5nr04854k1.pdf]

## Supporting Information

### **Mid-infrared spectroscopy beyond the diffraction limit via direct measurement of photothermal effect**

*A. M. Katzenmeyer,<sup>†</sup> G. Holland,<sup>†</sup> J. Chae,<sup>†‡</sup> A. Band,<sup>†</sup> K. Kjoller<sup>§</sup> and A. Centrone<sup>†\*</sup>*

<sup>†</sup>*Center for Nanoscale Science and Technology, National Institute of Standards and Technology, 100 Bureau Drive, Gaithersburg, Maryland 20899, USA.*

<sup>‡</sup>*Maryland Nanocenter, University of Maryland, College Park, MD 20742, USA.*

<sup>§</sup>*Anasys Instruments, Inc., 325 Chapala Street, Santa Barbara, California 93101, USA.*

<sup>\*</sup>*Email: andrea.centrone@nist.gov*

### Contents

|                         |          |
|-------------------------|----------|
| <b>Fig. S1:</b> .....   | <b>2</b> |
| <b>Table ST1:</b> ..... | <b>2</b> |
| <b>Fig. S2:</b> .....   | <b>3</b> |
| <b>Fig. S3:</b> .....   | <b>3</b> |

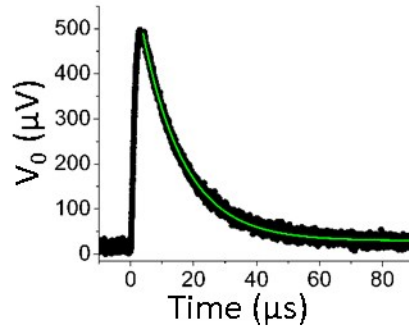

**Fig. S1:**

STIRM signal (black) obtained on a PMMA domain of *sample-2* (300 nm thick, which is also depicted in Fig. 2 of the main text) illuminated at  $1720\text{ cm}^{-1}$ . The exponential fit (green) yields a characteristic relaxation time of  $\approx 13\text{ }\mu\text{s}$ , an order of magnitude slower than that calculated for this thin film. The temporal response is thus probe-limited in this case. In general, for samples with relaxation times longer than the probe the temporal evolution of the photothermal signal can be used to obtain the sample thermal diffusivity and potentially its thermal conductivity also (see Fig. 1c and associated discussion).

| Thickness (nm) | $t_{\text{relax}}$ ( $\mu\text{s}$ ) | $\kappa$ ( $\text{Wm}^{-1}\text{K}^{-1}$ ) |
|----------------|--------------------------------------|--------------------------------------------|
| 1620           | 25.5                                 | 0.167                                      |
| 1800           | 32.5                                 | 0.162                                      |
| 2780           | 78.4                                 | 0.161                                      |
| 3130           | 99.2                                 | 0.162                                      |

**Table ST1:**

Nominal  $t_{\text{relax}}$  and  $\kappa$  extracted from measurements on Sample-1. Row 1 corresponds to fig. 1c.

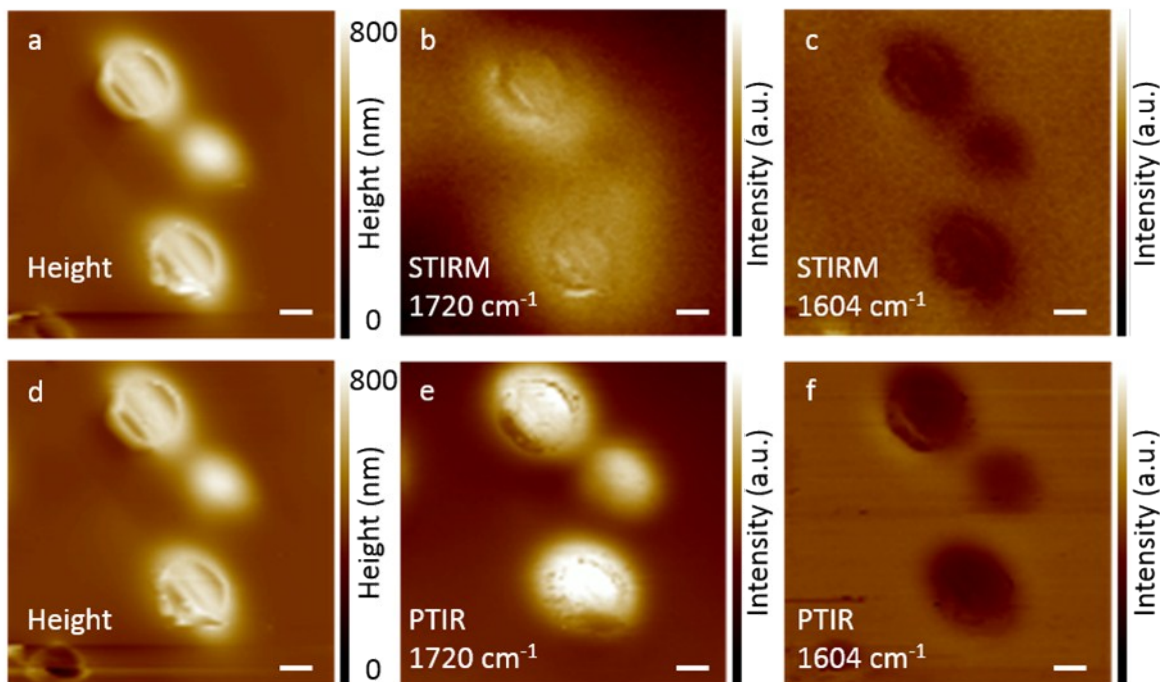

**Fig. S2:**

Topography (a) and STIRM images corresponding to PMMA (b) and epoxy (c) absorption frequencies for *sample-3* (on a different location with respect to figure 2 of the main text). Topography (d) and PTIR images corresponding to PMMA (e) and epoxy (f) absorption frequencies for *sample-3*. Images were obtained by averaging the signal for 64 laser pulses per pixel. Pixels are 100 nm x 100 nm. Scale bars are 1  $\mu\text{m}$ .

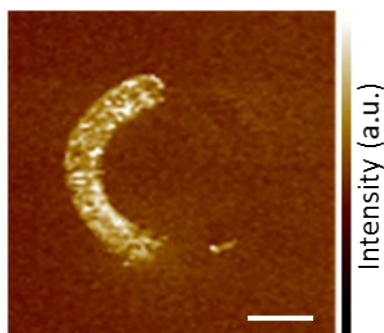

**Fig. S3:**

PTIR image recorded at  $1300\text{ cm}^{-1}$  ( $7.69\text{ }\mu\text{m}$ ) for the ASRR shown in Figure 3 of the main text. The signal distribution is clearly different than that observed by STIRM. Compare with figure 3d of the main text recorded at the same frequency (wavelength). Scale bar is 500 nm. Pixel size is 25 nm x 25 nm. Each pixel corresponds to the average signal generated for 64 laser pulses.
